# Supplementary material for: Phytogalactolipid dLGG Inhibits Mouse Melanoma Brain Metastasis through Regulating Oxylipin Activity and Re-Programming Macrophage Polarity in the Tumor Microenvironment
Source: MDPI journal article supplement (doi:10.3390/cancers13164120), 2021-08-16
Supplement: s1 [file s1]

**a**

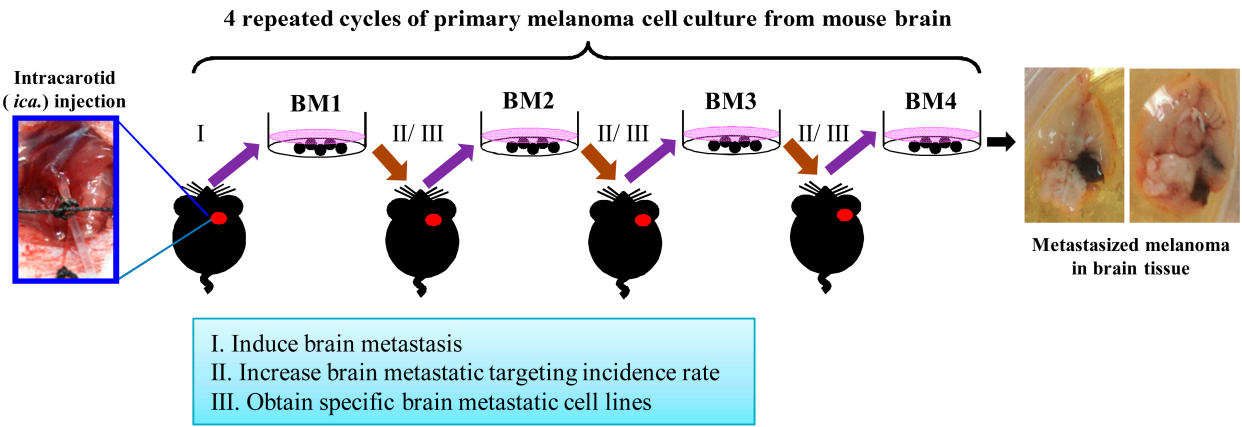

**b**

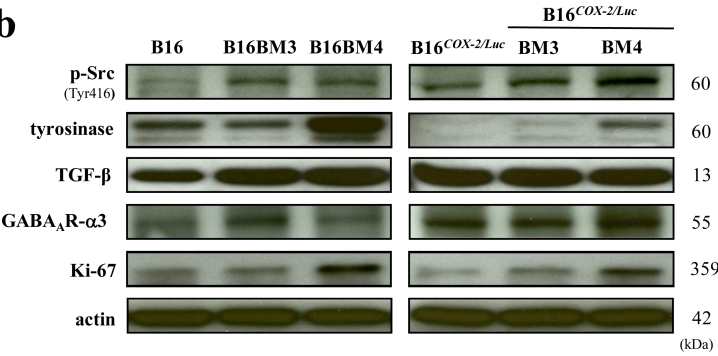

**c**

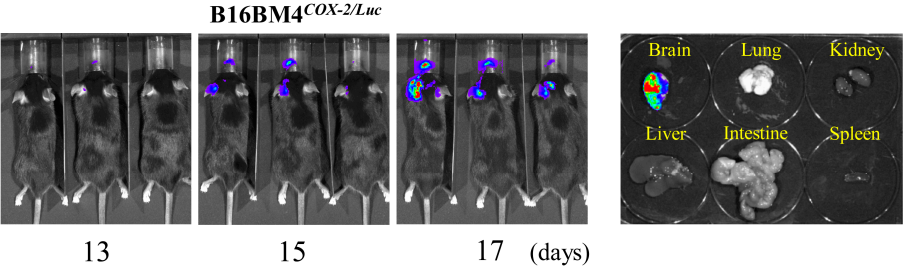

**d**

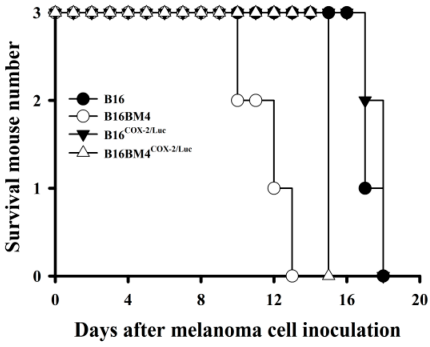

**e**

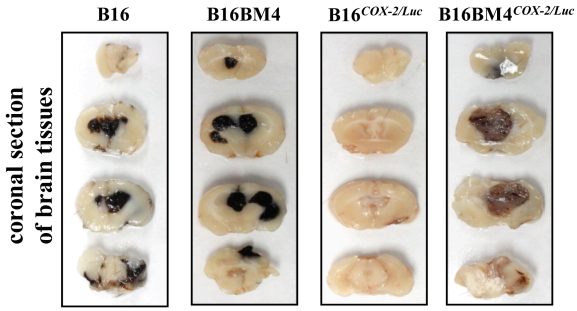

**Figure S1.** Brain-seeking cells acclimated by repeating primary culture from MBM mouse model and the different batches cell lines were selected according to brain metastasis related protein markers expression level by using western blot analysis. (a) The experimental scheme for obtaining brain-seeking cells from MBM mouse model. (b) The brain metastasis related protein markers, such as p-Src, tyrosinase, TGF- $\beta$ , GABA<sub>A</sub>R-3 $\alpha$ , and Ki-67, were used to select brain-seeking cells by western blot assay. (c) The MBM induced via ica. inject B16<sup>COX-2/Luc</sup>. The brain metastasis in mouse was monitored by IVIS imaging system. The bioluminescence intensity of different organs were detected immediately when the mouse sacrificed. (d) MBM mouse survival rate. (e) The coronal brain tissue sections demonstrated melanoma brain metastasis and growth in the brain parenchyma.

**a**

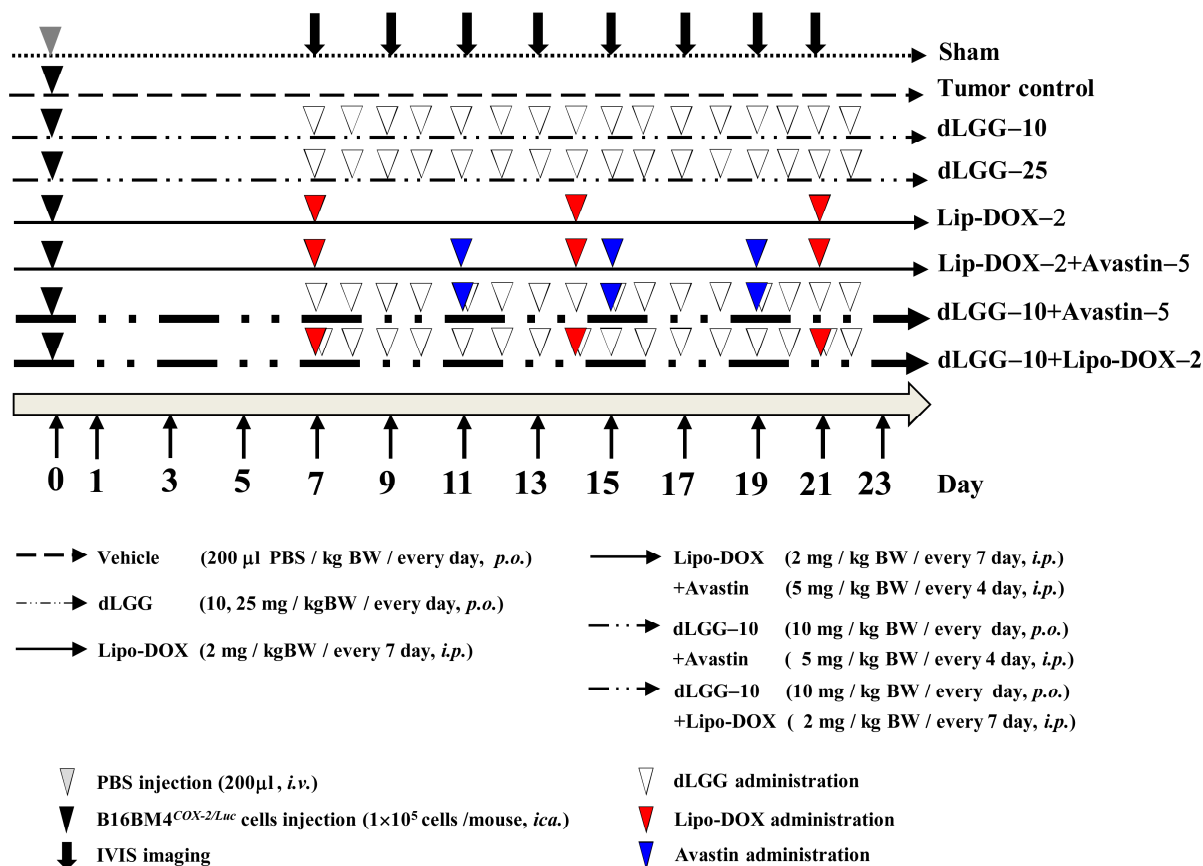

**b**

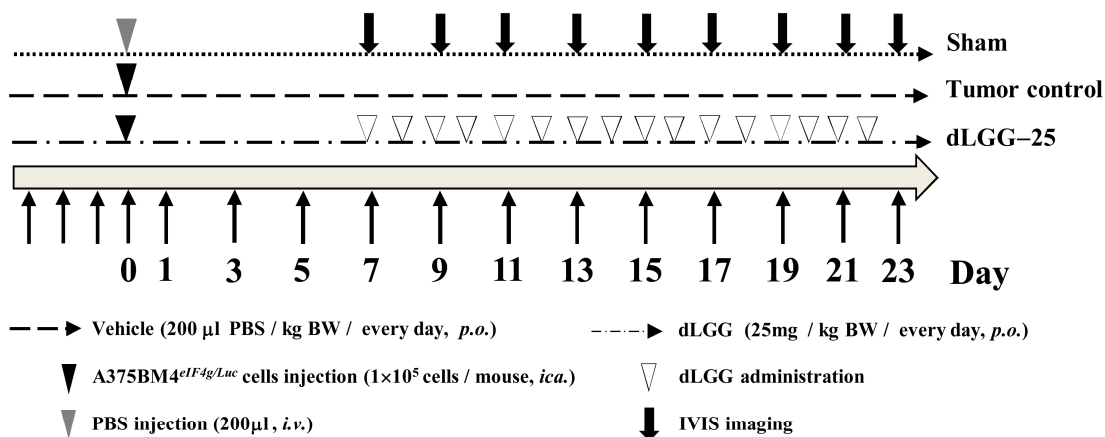

Figure S2. The experimental scheme of MBM mouse model. (a) The MBM induced by *ica*. injecting B16BM4<sup>COX-2/Luc</sup> in C57BL/J6 mouse. (b) MBM induced by *ica*. injecting A375BM4<sup>eIF4g/Luc</sup> in NOD/SCID mouse.



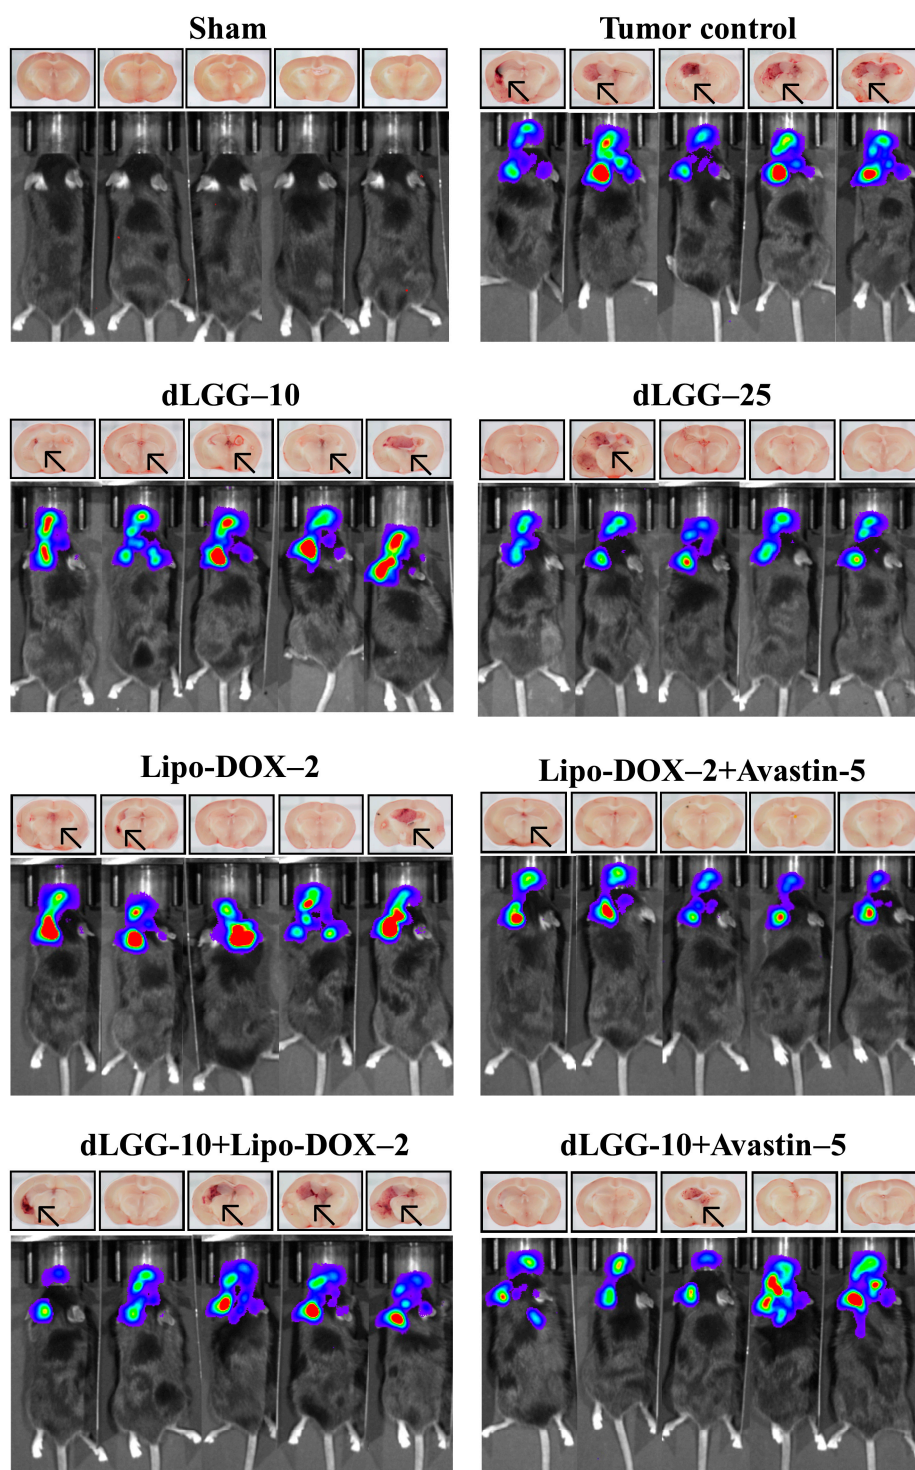

**Figure S3.** The coronal brain tissue sections in each experimental group were matched to the IVIS image of the corresponding mice in a B16BM4<sup>COX-2/Luc</sup> MBM mouse model. The brain tissues were obtained from each groups of mice at the day 17 after brain B16BM4<sup>COX-2/Luc</sup> melanoma established. Each brain tissue was placed in the rodent brain matrix and sliced into coronal sections with identified position of brain area. The coronal section of brain specimens from all of the respective sham, tumor control, and dLGG, Lipo-DOX, dLGG+Avastin, dLGG+Lipo-DOX or Lipo-DOX+Avastin treated mice are shown.

**Table S1**  
Oxylipin metabolites identified in the sera of mouse-implanted brain metastatic melanoma after treatment with vehicle PBS, dLGG, Lipo-Dox, or combination treatments.

|                        | Sham                         | Tumor control                 | dLGG-10                      | dLGG-25                       | Lipo-Dox-2                   | Lipo-Dox-2+<br>dLGG-10       | Lipo-Dox-2+<br>Avastin-5    | Avastin-5+<br>dLGG-10         |
|------------------------|------------------------------|-------------------------------|------------------------------|-------------------------------|------------------------------|------------------------------|-----------------------------|-------------------------------|
| <b>LA metabolites</b>  |                              |                               |                              |                               |                              |                              |                             |                               |
| 13-HODE                | 31.6 ± 9.3 <sup>ab</sup>     | 60.8 ± 12.7 <sup>b</sup>      | 58.7 ± 11.9 <sup>b</sup>     | 18.3 ± 3.68 <sup>a</sup>      | 18.0 ± 1.37 <sup>a</sup>     | 30.0 ± 14.4 <sup>ab</sup>    | 13.9 ± 1.08                 | 70.9 ± 39.0 <sup>ab</sup>     |
| 9-HODE                 | 22.2 ± 5.52 <sup>a</sup>     | 16.0 ± 4.37 <sup>abc</sup>    | 19.2 ± 2.82 <sup>ac</sup>    | 10.6 ± 1.80 <sup>b</sup>      | 12.6 ± 1.26 <sup>bc</sup>    | 14.0 ± 3.33 <sup>bc</sup>    | 9.66 ± 0.96 <sup>b</sup>    | 24.0 ± 8.2 <sup>ac</sup>      |
| 9,10,13-TriHOME        | 5.5 ± 0.2 <sup>a</sup>       | 5.9 ± 0.1 <sup>b</sup>        | 5.5 ± 0.2 <sup>a</sup>       | 5.5 ± 0.2 <sup>a</sup>        | 5.4 ± 0.2 <sup>a</sup>       | 5.7 ± 0.2 <sup>ab</sup>      | 5.5 ± 0.2 <sup>a</sup>      | 5.3 ± 0.0 <sup>a</sup>        |
| 9,12,13-TriHOME        | 5.2 ± 0.1 <sup>ab</sup>      | 5.4 ± 0.1 <sup>bc</sup>       | 5.4 ± 0.3 <sup>bc</sup>      | 5.3 ± 0.1 <sup>abc</sup>      | 5.2 ± 0.04 <sup>ab</sup>     | 5.5 ± 0.3 <sup>c</sup>       | 5.2 ± 0.06 <sup>a</sup>     | 5.4 ± 0.1 <sup>abc</sup>      |
| 9,10-EpOME             | 26.5 ± 6.12 <sup>a</sup>     | 17.6 ± 3.72 <sup>bc</sup>     | 23.0 ± 3.31 <sup>ab</sup>    | 13.8 ± 2.83 <sup>cd</sup>     | 13.4 ± 1.22 <sup>cd</sup>    | 17.8 ± 4.00 <sup>bc</sup>    | 9.74 ± 0.28 <sup>d</sup>    | 17.8 ± 8.0 <sup>cd</sup>      |
| 12,13-EpOME            | 38.9 ± 10.5 <sup>abc</sup>   | 53.7 ± 12.8 <sup>bc</sup>     | 62.5 ± 10.7 <sup>c</sup>     | 17.0 ± 3.11 <sup>a</sup>      | 18.1 ± 1.60 <sup>a</sup>     | 28.5 ± 15.3 <sup>ab</sup>    | 13.6 ± 2.57 <sup>a</sup>    | 66.8 ± 31.1 <sup>bc</sup>     |
| 9,10-DHOME             | 12.00 ± 2.12 <sup>ab</sup>   | 14.68 ± 7.23 <sup>b</sup>     | 11.13 ± 1.76 <sup>ab</sup>   | 11.37 ± 5.23 <sup>ab</sup>    | 11.58 ± 0.51 <sup>ab</sup>   | 12.83 ± 1.58 <sup>ab</sup>   | 7.53 ± 0.58 <sup>a</sup>    | 14.8 ± 2.6 <sup>ab</sup>      |
| 12,13-DHOME            | 8.4 ± 1.6 <sup>ab</sup>      | 9.0 ± 2.4 <sup>a</sup>        | 6.7 ± 0.3 <sup>bcd</sup>     | 6.1 ± 0.6 <sup>cd</sup>       | 7.0 ± 0.3 <sup>bcd</sup>     | 7.5 ± 0.7 <sup>ab</sup>      | 5.5 ± 0.3 <sup>d</sup>      | 6.9 ± 0.2 <sup>bcd</sup>      |
| <b>AA metabolites</b>  |                              |                               |                              |                               |                              |                              |                             |                               |
| 8-HETE                 | 147.0 ± 56.8 <sup>a</sup>    | 462.9 ± 88.8 <sup>b</sup>     | 332.0 ± 94.9 <sup>bc</sup>   | 83.6 ± 52.3 <sup>a</sup>      | 189.2 ± 70.5 <sup>ac</sup>   | 363.4 ± 128.2 <sup>bc</sup>  | 141.4 ± 48.5 <sup>a</sup>   | 494.9 ± 172.3 <sup>b</sup>    |
| 9-HETE                 | 16.80 ± 0.18 <sup>bc</sup>   | 18.52 ± 0.55 <sup>a</sup>     | 17.61 ± 0.48 <sup>c</sup>    | 16.62 ± 0.13 <sup>b</sup>     | 17.23 ± 0.36 <sup>bc</sup>   | 17.79 ± 0.39 <sup>c</sup>    | 16.89 ± 0.36 <sup>bc</sup>  | 17.5 ± 0.5 <sup>c</sup>       |
| 11-HETE                | 17.5 ± 0.57 <sup>abc</sup>   | 18.5 ± 0.44 <sup>c</sup>      | 18.2 ± 0.46 <sup>bc</sup>    | 16.7 ± 0.16 <sup>a</sup>      | 17.4 ± 0.56 <sup>ab</sup>    | 18.3 ± 0.96 <sup>bc</sup>    | 17.2 ± 0.43 <sup>ab</sup>   | 18.0 ± 1.0 <sup>abc</sup>     |
| 12-HETE                | 92.3 ± 31.5 <sup>a</sup>     | 270.0 ± 52.0 <sup>bd</sup>    | 248.6 ± 66.7 <sup>bd</sup>   | 53.8 ± 28.2 <sup>a</sup>      | 117.1 ± 39.4 <sup>a</sup>    | 221.9 ± 74.9 <sup>bcd</sup>  | 90.0 ± 29.3 <sup>a</sup>    | 179.2 ± 93.5 <sup>bc</sup>    |
| 15-HETE                | 207.5 ± 98.8 <sup>abc</sup>  | 446.0 ± 99.1 <sup>d</sup>     | 412.5 ± 112.2 <sup>d</sup>   | 110.1 ± 28.1 <sup>a</sup>     | 191.4 ± 67.2 <sup>abc</sup>  | 375.7 ± 131.2 <sup>bcd</sup> | 144.5 ± 47.1 <sup>a</sup>   | 489.8 ± 188.6 <sup>d</sup>    |
| 5-HETE                 | 16.6 ± 0.03 <sup>a</sup>     | 16.7 ± 0.10 <sup>bd</sup>     | 16.6 ± 0.06 <sup>abcd</sup>  | 16.5 ± 0.01 <sup>a</sup>      | 16.6 ± 0.06 <sup>abc</sup>   | 16.6 ± 0.04 <sup>bcd</sup>   | 16.5 ± 0.02 <sup>a</sup>    | 16.7 ± 0.0 <sup>cd</sup>      |
| LTA <sub>4</sub>       | 311.2 ± 37.4 <sup>a</sup>    | 248.1 ± 10.6 <sup>b</sup>     | 200.7 ± 27.0 <sup>cd</sup>   | 183.0 ± 27.0 <sup>d</sup>     | 285.0 ± 19.6 <sup>a</sup>    | 234.3 ± 20.0 <sup>bc</sup>   | 199.3 ± 16.9 <sup>cd</sup>  | 176.6 ± 12.3 <sup>d</sup>     |
| 5-oxo-EETE             | 17.3 ± 0.24 <sup>a</sup>     | 23.8 ± 3.10 <sup>c</sup>      | 21.1 ± 0.62 <sup>b</sup>     | 17.3 ± 0.09 <sup>a</sup>      | 17.9 ± 0.40 <sup>a</sup>     | 20.1 ± 2.44 <sup>ab</sup>    | 17.5 ± 0.52 <sup>a</sup>    | 21.8 ± 1.3 <sup>b</sup>       |
| 5,6-EET                | 183.7 ± 49.7 <sup>ac</sup>   | 361.1 ± 79.8 <sup>b</sup>     | 286.0 ± 60.2 <sup>bc</sup>   | 131.3 ± 27.4 <sup>a</sup>     | 189.0 ± 73.2 <sup>ac</sup>   | 302.7 ± 121.1 <sup>bc</sup>  | 145.9 ± 40.1 <sup>a</sup>   | 254.2 ± 103.2 <sup>ac</sup>   |
| 8,9-EET                | 115.5 ± 12.4 <sup>a</sup>    | 176.0 ± 36.1 <sup>a</sup>     | 153.8 ± 30.8 <sup>a</sup>    | 135.6 ± 83.5 <sup>a</sup>     | 123.7 ± 29.4 <sup>a</sup>    | 188.0 ± 60.5 <sup>a</sup>    | 110.2 ± 14.2 <sup>a</sup>   | 141.6 ± 60.0 <sup>a</sup>     |
| 11,12-EET              | 247.2 ± 82.8 <sup>abc</sup>  | 319.7 ± 33.2 <sup>c</sup>     | 261.5 ± 45.5 <sup>ac</sup>   | 135.8 ± 32.6 <sup>a</sup>     | 222.9 ± 66.4 <sup>abc</sup>  | 279.7 ± 99.9 <sup>bc</sup>   | 160.0 ± 42.4 <sup>ab</sup>  | 311.7 ± 142.5 <sup>abc</sup>  |
| 14,15-EET              | 119.9 ± 22.1 <sup>abc</sup>  | 139.1 ± 26.7 <sup>bcd</sup>   | 176.2 ± 38.6 <sup>d</sup>    | 89.2 ± 5.09 <sup>a</sup>      | 112.0 ± 17.9 <sup>abc</sup>  | 145.3 ± 41.6 <sup>cd</sup>   | 95.4 ± 11.1 <sup>ab</sup>   | 165.3 ± 46.6 <sup>cd</sup>    |
| 14,15-DHET             | 117.1 ± 22.6 <sup>ab</sup>   | 150.7 ± 52.9 <sup>b</sup>     | 103.3 ± 5.59 <sup>ab</sup>   | 117.4 ± 52.6 <sup>ab</sup>    | 109.9 ± 8.84 <sup>ab</sup>   | 116.6 ± 22.0 <sup>ab</sup>   | 89.0 ± 4.8 <sup>a</sup>     | 142.4 ± 4.2 <sup>ab</sup>     |
| 19-HETE                | 25.3 ± 3.7 <sup>a</sup>      | 45.8 ± 6.5 <sup>b</sup>       | 43.2 ± 7.77 <sup>b</sup>     | 20.5 ± 3.06 <sup>a</sup>      | 28.5 ± 5.50 <sup>a</sup>     | 41.2 ± 8.20 <sup>b</sup>     | 24.4 ± 3.12 <sup>a</sup>    | 48.3 ± 12.5 <sup>b</sup>      |
| 20-HETE                | 34.0 ± 7.21 <sup>a</sup>     | 76.4 ± 15.6 <sup>c</sup>      | 72.1 ± 15.0 <sup>c</sup>     | 25.2 ± 6.75 <sup>a</sup>      | 40.1 ± 9.87 <sup>ab</sup>    | 64.5 ± 17.2 <sup>bc</sup>    | 34.8 ± 8.2 <sup>a</sup>     | 80.7 ± 24.5 <sup>c</sup>      |
| <b>DHA metabolites</b> |                              |                               |                              |                               |                              |                              |                             |                               |
| DHA                    | 6726.5 ± 651.4 <sup>ac</sup> | 15465.5 ± 4095.9 <sup>b</sup> | 9011.6 ± 684.0 <sup>ac</sup> | 10252.0 ± 4005.0 <sup>c</sup> | 8117.7 ± 845.5 <sup>ac</sup> | 9487.0 ± 3514.5 <sup>c</sup> | 4843.2 ± 897.8 <sup>a</sup> | 9029.7 ± 3205.5 <sup>ac</sup> |
| 17-HDHA                | 364.1 ± 215.1 <sup>a</sup>   | 2182.1 ± 268.82 <sup>b</sup>  | 1464.5 ± 305.1 <sup>c</sup>  | 347.6 ± 98.2 <sup>a</sup>     | 386.1 ± 192.1 <sup>a</sup>   | 718.3 ± 637.8 <sup>a</sup>   | 198.7 ± 102.9 <sup>a</sup>  | 538.9 ± 377.7 <sup>a</sup>    |
| <b>EPA metabolites</b> |                              |                               |                              |                               |                              |                              |                             |                               |
| EPA                    | 332.2 ± 54.9 <sup>a</sup>    | 428.3 ± 99.6 <sup>b</sup>     | 279.4 ± 40.5 <sup>ac</sup>   | 183.6 ± 22.1 <sup>acd</sup>   | 244.8 ± 13.7 <sup>acd</sup>  | 281.8 ± 106.2 <sup>ac</sup>  | 171.2 ± 32.3 <sup>d</sup>   | 242.5 ± 57.5 <sup>acd</sup>   |
| 15-HEPE                | 198.0 ± 20.7 <sup>a</sup>    | 162.4 ± 6.6 <sup>b</sup>      | 165.0 ± 14.7 <sup>b</sup>    | 124.2 ± 6.78 <sup>c</sup>     | 179.7 ± 10.6 <sup>b</sup>    | 170.4 ± 4.2 <sup>b</sup>     | 163.1 ± 4.0 <sup>b</sup>    | 142.5 ± 12.3 <sup>d</sup>     |

Mouse blood was collected from heart, and serum flash-frozen in -80°C immediately after centrifuge isolation. Groups are defined as Sham (normal mouse), Tumor control (vehicle control: PBS with 5% DMSO), 10 mg/kg dLGG (dLGG-10), 20 mg/kg dLGG (dLGG-20), 2 mg/kg Liposomal doxorubicin (Lipo-Dox-2), and 5 mg/kg Avastin (Avastin-5). Data are means ± SEM (ng/ml; *n* = 4, *P* < 0.05, ANOVA, *post hoc* LSD).

**Table S2**

LA-derived oxylipins in the culture medium of B16BM4 cells with vehicle or dLGG treatments.

| Substrate | Catalytic enzyme     | Oxylipins       | Vehicle                      | dLGG –70                     | dLGG –140                    |
|-----------|----------------------|-----------------|------------------------------|------------------------------|------------------------------|
| LA        | 15-LOX               |                 | 62496.3 ± 503.2 <sup>a</sup> | 25682.9 ± 252.4 <sup>a</sup> | 55178.5 ± 395.0 <sup>a</sup> |
|           |                      | 13-HODE         | 0 <sup>a</sup>               | 1880.7 ± 150.0 <sup>b</sup>  | 4413.5 ± 256.6 <sup>c</sup>  |
|           |                      | 9-HODE          | 0 <sup>a</sup>               | 3873.1 ± 208.4 <sup>b</sup>  | 5952.5 ± 1283.3 <sup>b</sup> |
|           | 9-LOX                | 9,10,13-TriHOME | 0 <sup>a</sup>               | 1650.3 ± 181.3 <sup>b</sup>  | 1890.8 ± 986.7 <sup>b</sup>  |
|           |                      | 9,12,13-TriHOME | 0 <sup>a</sup>               | 1350.9 ± 169.3 <sup>b</sup>  | 1872.1 ± 526.3 <sup>b</sup>  |
|           |                      |                 |                              |                              |                              |
|           | CYP450 (epoxygenase) | 9,10-EpOME      | 0 <sup>a</sup>               | 3785.6 ± 208.0 <sup>b</sup>  | 5812.4 ± 1285.1 <sup>c</sup> |
|           |                      | 12,13-EpOME     | 0 <sup>a</sup>               | 1833.8 ± 153.3 <sup>b</sup>  | 4230.2 ± 247.1 <sup>c</sup>  |

The culture media were immediately collected after 24 h treatment with vehicle, 70 µM dLGG (dLGG–70), or 140 µM dLGG (dLGG–140), and then subjected to solid-phase column extraction and LC/MS/MS analysis.

Data are mean ± SEM (pg/ml; *n* = 3).
